# Supplementary material
Source: PubMed Central journal article supplement (PMC7193942)
Supplement: NIHMS1574560-supplement-supplement.pdf [file NIHMS1574560-supplement-supplement.pdf]

A Randomized, Controlled Trial of the Impact of the Couple CARE for Parents of Newborns  
Program on the Prevention of Intimate Partner Violence and Relationship Problems

Richard E. Heyman, Amy M. Smith Slep, Michael F. Lorber, Danielle M. Mitnick, Shu

Xu, Katherine J. W. Baucom

New York University

W. Kim Halford

University of Queensland

Phyllis Holditch Nolon

Centers for Disease Control and Prevention

Corresponding Author: Richard E. Heyman, Richard.Heyman@NYU.edu

**START ONLINE SUPPLEMENT CONTENT HERE**

**Data Analysis Supplement**

Below we describe in detail the three statistical methods used to model intervention effects: (a) Intent to Treat (ITT) assuming missing data were missing at random (MAR; Rubin, 1976), (b) Complier Average Causal Effect (CACE) assuming MAR, and (c) CACE assuming latent ignorability (LI; Frangakis & Rubin, 1999).

**ITT.** The ITT approach follows the “analyze as you randomize” maxim. This method addressed the effects of merely assigning participants to the intervention versus control conditions. We assumed missing values were MAR. Thus, the results are valid if the probabilities of observing missing values depend on observed data but not on missing data (Schafer & Graham, 2002).

**CACE.** The CACE approach extends the ITT approach by taking into account participant noncompliance with treatment (Jo & Muthén, 2001). This approach is particularly relevant in prevention research, in which both missing outcome data and noncompliance with the intervention often occur (Jo, Ginexi, & Ialongo, 2010). CACE estimation is recommended in addition to ITT for the study of family-based prevention programs (Huang et al., 2014).

In CACE models, compliance status is treated as a partially observable dichotomous variable. The CACE approach divides the entire sample into “compliers” (i.e., couples who

either did comply with the intervention [when in the intervention group] or would have complied if given the opportunity [when in the control group]) versus “never started” (i.e., couples who either did *not* comply with the intervention [when in the intervention group] or would not have complied if given the opportunity [when in the control group]). As couples in the control condition did not have access to CCP, other types of noncompliance (i.e., “defiers” and “always-takers”; Jo et al., 2010) were not possible in the current study. Compliance in the intervention group was defined as having attended at least the first four intervention sessions (54.0% of intervention group participants) because (a) it marks having attended more than half of the sessions and (b) it includes all the segments on couple communication and conflict management. Compliance status was directly observable in the CCP intervention group but was, by definition, not observable in the control group.

We conducted two series of CACE analyses, one assuming MAR (Jo & Muthén, 2001) and one assuming LI (Jo et al., 2010). The approach under the MAR assumption is described above in the ITT section. Specifically, in the control group, the response rates (i.e., provision of outcome data) were assumed to be equal for the complier and never started couples. Given that the mechanism of missing data in an intervention trial is unknown and responses rates among the compliers in the intervention group (range = 78% - 85% at post-program, range = 64% - 84% at follow-up assessment) are much higher than those among the never started in the intervention group (21% at post-program, range = 12% - 35% at follow-up assessments), we further conducted analyses assuming LI. This was based on the possibility that the missing values in the study were not related to the observed responses (i.e., missing at random), but might be related to unobserved responses (i.e., missing not at random). Under LI, we assumed that the probabilities of observing missing values depend on the observed and the latent compliance class indicator

and that the response rates of the compliers in the intervention and the control groups were equal.

Running analyses under various missing assumption would allow us to have a better sense of how robust the estimated intervention effects were under differing types of missing data assumptions.

Table 1  
*Primary Prevention; Lifetime Rates of Physical CS-IPV by Time and Condition*

|                         | Post-Program |          | Follow-Ups |          |         |          |
|-------------------------|--------------|----------|------------|----------|---------|----------|
|                         | Mos. 8       | <i>n</i> | Mos. 15    | <i>n</i> | Mos. 24 | <i>n</i> |
| ♂→♀ CS-IPV              |              |          |            |          |         |          |
| CCP                     | 6            | 98       | 8          | 81       | 6       | 107      |
| Control                 | 13           | 112      | 9          | 93       | 3       | 111      |
| ♀→♂ CS-IPV              |              |          |            |          |         |          |
| CCP                     | 6            | 85       | 4          | 71       | 6       | 96       |
| Control                 | 8            | 88       | 3          | 71       | 6       | 85       |
| Any CS-IPV (♂→♀ or ♀→♂) |              |          |            |          |         |          |
| CCP                     | 8            | 82       | 5          | 68       | 9       | 92       |
| Control                 | 12           | 94       | 5          | 75       | 7       | 94       |

*Note.* Fisher's exact tests of differences between rates of CS-IPV in CCP versus control couples were not significant. These data include only those couples who reported a *first occurrence* at a time point after completing the program (i.e., did not report CS-IPV in the baseline assessment, but did report CS-IPV at post-program or follow-up assessments). CS-IPV was scored as present based on either self-report of perpetration or partner report of victimization in either of the following: (1) injurious act: (a) any act of physical aggression on CTS2 AND (b) having a sprain, bruise, or small cut; passing out from being hit on the head; going to the doctor; needing to go to the doctor, but not doing so; having a broken bone; or feeling a physical pain that still hurt the next day; or (2) act with high potential for injury: burning or scalding on purpose; use of a knife or gun; choking; or beating up. A small but notable number of couples did not screen in with CS-IPV in the eligibility screening but reported it on the more extensive baseline questionnaire packet. Because they already were reporting CS-IPV, they were excluded from their respective primary prevention analyses: ♂→♀ CS-IPV ( $n = 21$ ; 10 CCP and 11 control couples); ♀→♂ CS-IPV ( $n = 35$ ; 17 CCP and 18 control couples); ♂→♀ or ♀→♂ CS-IPV ( $n = 41$ ; 21 CCP and 20 control couples).

Table 2  
 Primary Prevention Effects of Couple CARE for Parents on Clinically Significant Intimate Partner Violence

| Clinically Significant-IPV Outcome      | Intent to Treat (ITT) |          |      |              |          |          |      |              |          |          |      |               |
|-----------------------------------------|-----------------------|----------|------|--------------|----------|----------|------|--------------|----------|----------|------|---------------|
|                                         | MAR                   |          |      |              | MAR      |          |      |              | LI       |          |      |               |
|                                         | <i>B</i>              | <i>p</i> | OR   | 95% CI       | <i>B</i> | <i>p</i> | OR   | 95% CI       | <i>B</i> | <i>p</i> | OR   | 95% CI        |
| Physical CS-IPV ♀ → ♂ ( <i>n</i> = 288) | -0.05                 | 0.839    | 0.93 | [0.46, 1.89] | 0.12     | 0.844    | 1.22 | [0.18, 8.23] | 0.26     | 0.702    | 1.51 | [0.18, 12.28] |
| Physical CS-IPV ♂ → ♀ ( <i>n</i> = 301) | -0.07                 | 0.749    | 0.90 | [0.45, 1.76] | -0.29    | 0.354    | 0.63 | [0.24, 1.67] | -0.19    | 0.515    | 0.73 | [0.29, 1.86]  |

Note. *B* = unstandardized probit regression coefficient for the primary prevention effect (lower level IPV as reference group); *p* = p-value; OR = odds ratio; MAR = missing at random; LI = latent ignorability; IPV = intimate partner violence; ♂ = male; ♀ = female.

Table 3  
*Baseline Equivalence Tests for Continuous Variables – Male Report*

| Variable                                     | Control<br>( <i>n</i> = 180) |           | CCP<br>( <i>n</i> = 188) |           | CCP vs.<br>Control |          |
|----------------------------------------------|------------------------------|-----------|--------------------------|-----------|--------------------|----------|
|                                              | <i>M</i>                     | <i>SD</i> | <i>M</i>                 | <i>SD</i> | <i>t</i>           | <i>p</i> |
| Physical IPV perpetration                    | 0.06                         | 0.17      | 0.05                     | 0.12      | 0.45               | .867     |
| Physical IPV victimization                   | 0.10                         | 0.25      | 0.09                     | 0.21      | 0.36               | .867     |
| Psychological IPV perpetration               | 0.64                         | 0.61      | 0.51                     | 0.53      | 1.63               | .867     |
| Psychological IPV victimization              | 0.71                         | 0.68      | 0.59                     | 0.60      | 1.36               | .867     |
| Relationship satisfaction                    | 126.02                       | 23.77     | 125.86                   | 22.58     | 0.05               | .976     |
| Dysfunctional attributions                   | 2.66                         | 0.86      | 2.68                     | 0.91      | -0.19              | .892     |
| Self-regulation                              | 3.59                         | 0.64      | 3.59                     | 0.55      | -0.01              | .994     |
| Collaboration (self)                         | 2.53                         | 0.34      | 2.50                     | 0.34      | 0.62               | .867     |
| Stalemate (self)                             | 0.86                         | 0.52      | 0.83                     | 0.50      | 0.49               | .867     |
| Avoidance-capitulation (self)                | 1.52                         | 0.53      | 1.63                     | 0.50      | -1.55              | .867     |
| Child conflict exposure (self)               | 0.37                         | 0.44      | 0.35                     | 0.55      | 0.28               | .867     |
| Collaboration (partner)                      | 2.28                         | 0.51      | 2.32                     | 0.46      | -0.52              | .867     |
| Stalemate (partner)                          | 1.15                         | 0.59      | 1.06                     | 0.56      | 1.21               | .867     |
| Avoidance-capitulation (partner)             | 1.35                         | 0.45      | 1.41                     | 0.50      | -0.95              | .867     |
| Child conflict exposure (partner)            | 0.41                         | 0.49      | 0.38                     | 0.56      | 0.50               | .867     |
| Mother age                                   | 26.52                        | 3.81      | 26.99                    | 3.71      | -1.21              | .867     |
| Father age                                   | 29.42                        | 5.30      | 29.23                    | 5.23      | 0.35               | .867     |
| Household size                               | 4.37                         | 1.61      | 4.45                     | 1.61      | -0.46              | .867     |
| Parent-infant bonding <sup>a</sup>           | -0.27                        | 1.04      | -0.14                    | 1.10      | -0.93              | .867     |
| Infant distress to limitations <sup>b</sup>  | 3.59                         | 0.87      | 3.37                     | 0.88      | 1.79               | .867     |
| Infant recovery from reactivity <sup>b</sup> | 4.52                         | 0.88      | 4.44                     | 0.84      | 0.68               | .867     |
| Child-related rigidity <sup>c</sup>          | 0.33                         | 0.22      | 0.35                     | 0.24      | -0.87              | .867     |
| Cumulative risk                              | 0.38                         | 0.31      | 0.34                     | 0.30      | 1.13               | .867     |

*Note.* Independent samples *t*-tests with FDR-adjusted *p*-values; CCP = Couple CARE for Parents; IPV = intimate partner violence.

<sup>a</sup> The parent-infant bonding score was the mean standardized item average scores of Postpartum Bonding Questionnaire (PBQ; Brockington, Fraser, & Wilson, 2006), Parent-Infant Attachment Scale (PAS; Condon & Corkindale, 1998), and Mother to Infant Bonding Scale (IBS; Taylor, Atkins, Kumar, Adams, & Glover, 2005). Higher scores indicate worse parent-child bonding.

<sup>b</sup> Parent reports on infant temperament were measured with the Infant Distress to Limitations and Recovery from Reactivity subscales of the Revised Infant Behavior Questionnaire (Gartstein & Rothbart, 2003). Higher scores indicate more difficult temperament.

<sup>c</sup> Parent reports on child-related rigidity, measured with 14 rigidity items from the Child Abuse Potential Inventory (Milner, 1994), reflect developmentally unrealistic standards for child behavior. Higher scores indicate higher risk for abuse.

Table 4  
*Baseline Equivalence Tests for Continuous Variables – Female Report*

| Variable                                     | Control<br>( <i>n</i> = 180) |           | CCP<br>( <i>n</i> = 188) |           | CCP vs.<br>Control |          |
|----------------------------------------------|------------------------------|-----------|--------------------------|-----------|--------------------|----------|
|                                              | <i>M</i>                     | <i>SD</i> | <i>M</i>                 | <i>SD</i> | <i>t</i>           | <i>p</i> |
| Physical IPV perpetration                    | 0.09                         | 0.18      | 0.08                     | 0.17      | 0.34               | .867     |
| Physical IPV victimization                   | 0.05                         | 0.13      | 0.04                     | 0.10      | 0.95               | .867     |
| Psychological IPV perpetration               | 0.82                         | 0.60      | 0.84                     | 0.59      | -0.32              | .867     |
| Psychological IPV victimization              | 0.77                         | 0.64      | 0.75                     | 0.58      | 0.36               | .867     |
| Relationship satisfaction                    | 123.06                       | 24.62     | 118.56                   | 24.88     | 1.57               | .867     |
| Dysfunctional attributions                   | 2.66                         | 0.94      | 2.93                     | 0.97      | -2.45              | .390     |
| Self-regulation                              | 3.61                         | 0.56      | 3.59                     | 0.58      | 0.31               | .867     |
| Collaboration (self)                         | 2.50                         | 0.32      | 2.52                     | 0.30      | -0.38              | .867     |
| Stalemate (self)                             | 1.27                         | 0.51      | 1.33                     | 0.55      | -0.98              | .867     |
| Avoidance-capitulation (self)                | 1.48                         | 0.45      | 1.56                     | 0.55      | -1.27              | .867     |
| Child conflict exposure (self)               | 0.36                         | 0.45      | 0.32                     | 0.34      | 0.85               | .867     |
| Collaboration (partner)                      | 2.31                         | 0.43      | 2.25                     | 0.49      | 1.15               | .867     |
| Stalemate (partner)                          | 0.86                         | 0.43      | 0.84                     | 0.47      | 0.46               | .867     |
| Avoidance-capitulation (partner)             | 1.53                         | 0.49      | 1.58                     | 0.54      | -0.91              | .867     |
| Child conflict exposure (partner)            | 0.35                         | 0.42      | 0.33                     | 0.38      | 0.47               | .867     |
| Mother age                                   | 26.52                        | 3.81      | 26.99                    | 3.71      | -1.21              | .867     |
| Father age                                   | 29.42                        | 5.30      | 29.23                    | 5.23      | 0.35               | .867     |
| Household size                               | 4.37                         | 1.61      | 4.45                     | 1.61      | -0.46              | .867     |
| Parent-infant bonding <sup>a</sup>           | 0.16                         | 0.71      | 0.13                     | 0.62      | 0.42               | .867     |
| Infant distress to limitations <sup>b</sup>  | 3.35                         | 0.87      | 3.63                     | 1.00      | -2.47              | .390     |
| Infant recovery from reactivity <sup>b</sup> | 5.02                         | 0.90      | 4.90                     | 0.96      | 1.11               | .867     |
| Child-related rigidity <sup>c</sup>          | 0.28                         | 0.22      | 0.29                     | 0.22      | -0.21              | .892     |
| Cumulative risk                              | 0.33                         | 0.26      | 0.30                     | 0.26      | 0.99               | .867     |

*Note.* Independent samples *t*-tests with FDR-adjusted *p*-values; CCP = Couple CARE for Parents; IPV = intimate partner violence;

<sup>a</sup> The parent-infant bonding score was the mean standardized item average scores of Postpartum Bonding Questionnaire (PBQ; Brockington, Fraser, & Wilson, 2006), Parent-Infant Attachment Scale (PAS; Condon & Corkindale, 1998), and Mother to Infant Bonding Scale (IBS; Taylor, Atkins, Kumar, Adams, & Glover, 2005). Higher scores indicate worse parent-child bonding.

<sup>b</sup> Parent reports on infant temperament were measured with the Infant Distress to Limitations and Recovery from Reactivity subscales of the Revised Infant Behavior Questionnaire (Gartstein & Rothbart, 2003). Higher scores indicate more difficult temperament.

<sup>c</sup> Parent reports on child-related rigidity, measured with 14 rigidity items from the Child Abuse Potential Inventory (Milner, 1994), reflect developmentally unrealistic standards for child behavior. Higher scores indicate higher risk for abuse.

Table 5  
Baseline Equivalence Tests for Categorical Variables

| Variable           | Category                       | Control<br>(n = 180) | CCP<br>(n = 188) | CCP vs. Control |      |      |
|--------------------|--------------------------------|----------------------|------------------|-----------------|------|------|
|                    |                                |                      |                  | $\chi^2$        | df   | p    |
| Race/ethnicity - ♀ | African-American (non-Latino)  | 14.7%                | 16.7%            | 1.24            | 3.00 | .867 |
|                    | Latino (any race)              | 20.7%                | 16.1%            |                 |      |      |
|                    | White (non-Latino)             | 58.7%                | 58.8%            |                 |      |      |
|                    | Multiracial/other (non-Latino) | 7.1%                 | 7.3%             |                 |      |      |
| Race/ethnicity - ♂ | African-American (non-Latino)  | 17.4%                | 19.8%            | 0.77            | 3.00 | .892 |
|                    | Latino (any race)              | 23.4%                | 21.9%            |                 |      |      |
|                    | White (non-Latino)             | 55.1%                | 50.6%            |                 |      |      |
|                    | Multiracial/other (non-Latino) | 5.5%                 | 6.3%             |                 |      |      |
| Education - ♀      | Some high school               | 10.8%                | 9.4%             | 5.70            | 5    | .867 |
|                    | High school grad/GED           | 19.0%                | 16.6%            |                 |      |      |
|                    | Some college/vocational        | 36.2%                | 32.1%            |                 |      |      |
|                    | College grad                   | 13.5%                | 22.3%            |                 |      |      |
|                    | Some grad school               | 5.3%                 | 3.7%             |                 |      |      |
|                    | Graduate degree received       | 16.2%                | 15.1%            |                 |      |      |
| Education - ♂      | Some high school               | 7.6%                 | 9.4%             | 3.50            | 5    | .867 |
|                    | High school grad/GED           | 29.2%                | 26.4%            |                 |      |      |
|                    | Some college/vocational        | 36.2%                | 33.7%            |                 |      |      |
|                    | College grad                   | 12.5%                | 13.9%            |                 |      |      |
|                    | Some grad school               | 1.6%                 | 4.1%             |                 |      |      |
|                    | Grad degree received           | 14.1%                | 11.4%            |                 |      |      |
| Marital status     | Married                        | 59.5%                | 59.5%            | 0.08            | 1    | .867 |
|                    | Living together                | 41.7%                | 39.3%            |                 |      |      |
| Pregnancy          | Unplanned                      | 51.5%                | 47.2%            | 0.60            | 1    | .867 |
|                    | Planned                        |                      | 52.5%            |                 |      |      |

Note. ♂ = male; ♀ = female. Pearson  $\chi^2$  tests for independence with FDR-adjusted *p*-values; GED is general equivalency diploma.



Table 6  
*Descriptive Statistics for Selected Covariates at Baseline*

| Variable                                             | Control       | CCP Non-Compliers | CCP Compliers |
|------------------------------------------------------|---------------|-------------------|---------------|
|                                                      | <i>M (SD)</i> | <i>M (SD)</i>     | <i>M (SD)</i> |
| Age - ♀                                              | 26.52 (3.84)  | 26.57 (4.06)      | 27.25 (3.43)  |
| Education - ♀                                        | 2.17 (1.44)   | 1.79 (1.17)       | 2.41 (1.54)   |
| Education - ♂                                        | 2.34 (1.53)   | 2.01 (1.35)       | 2.68 (1.49)   |
| Household size                                       | 4.31 (1.49)   | 4.66 (1.68)       | 4.24 (1.56)   |
| Married (1 = yes)                                    | 0.41 (0.49)   | 0.55 (0.50)       | 0.29 (0.46)   |
| Planned pregnancy (1 = yes)                          | 0.49 (0.50)   | 0.47 (0.50)       | 0.60 (0.49)   |
| Parent-infant bonding <sup>a, b</sup>                | 1.13 (0.20)   | 1.20 (0.30)       | 1.09 (0.18)   |
| Infant distress to limitations <sup>a</sup>          | 3.36 (0.76)   | 3.28 (0.81)       | 3.65 (0.91)   |
| Infant recovery from reactivity <sup>a, c</sup>      | 4.81 (0.83)   | 4.65 (0.78)       | 4.64 (0.89)   |
| Child-related rigidity <sup>a, d</sup>               | 0.30 (0.19)   | 0.35 (0.20)       | 0.28 (0.20)   |
| Dysfunctional relationship attributions <sup>a</sup> | 2.51 (0.76)   | 2.56 (0.84)       | 2.75 (0.85)   |

*Note.* ♂ = male; ♀ = female. Covariates were selected based on  $p < .10$  pairwise differences between compliers (couples who attended 4-8 sessions;  $n = 102$ ), non-compliers (attended 0-3 sessions;  $n = 86$ ), and controls ( $n = 180$ ).

<sup>a</sup> Couple average score. <sup>b</sup> 1 = some high school, 2 = high school graduate/GED, 3 = some college/vocational school, 4 = college graduate, 5 = some graduate school, and 6 = graduate degree received. <sup>c</sup> The parent-infant bonding score was the mean standardized item average scores of Postpartum Bonding Questionnaire (PBQ; Brockington, Fraser, & Wilson, 2006), Parent-Infant Attachment Scale (PAS; Condon & Corkindale, 1998), and Mother to Infant Bonding Scale (IBS; Taylor, Atkins, Kumar, Adams, & Glover, 2005). Higher scores indicate worse parent-child bonding. <sup>d</sup> Parent reports on infant temperament were measured with the Infant Distress to Limitations and Recovery from Reactivity subscales of the Revised Infant Behavior Questionnaire (Gartstein & Rothbart, 2003). Higher scores indicate more difficult temperament. <sup>e</sup> Parent reports on child-related rigidity, measured with 14 rigidity items from the Child Abuse Potential Inventory (Milner, 1994), reflect developmentally unrealistic standards for child behavior. Higher scores indicate higher risk for abuse.

Table 7  
*Descriptive Statistics for Relationship Outcomes at Baseline, Post-Program, and Follow-Ups*

| Outcome/Group                            | Baseline              | Post-Program        | Follow-Ups           |                      |
|------------------------------------------|-----------------------|---------------------|----------------------|----------------------|
|                                          | Mos. 0-3<br>(n = 368) | Mos. 8<br>(n = 213) | Mos. 15<br>(n = 175) | Mos. 24<br>(n = 217) |
|                                          | <i>M (SD)</i>         | <i>M (SD)</i>       | <i>M (SD)</i>        | <i>M (SD)</i>        |
| <b>Physical IPV ♂→♀<sup>a</sup></b>      |                       |                     |                      |                      |
| Control                                  | 0.14 (0.29)           | 0.15 (0.31)         | 0.11 (0.21)          | 0.11 (0.29)          |
| CCP non-compliers                        | 0.14 (0.26)           | 0.16 (0.21)         | 0.19 (0.48)          | 0.10 (0.18)          |
| CCP compliers                            | 0.13 (0.27)           | 0.14 (0.34)         | 0.11 (0.29)          | 0.11 (0.26)          |
| <b>Physical IPV ♀→♂<sup>a</sup></b>      |                       |                     |                      |                      |
| Control                                  | 0.08 (0.19)           | 0.14 (0.33)         | 0.10 (0.23)          | 0.07 (0.18)          |
| CCP non-compliers                        | 0.09 (0.17)           | 0.16 (0.21)         | 0.24 (0.59)          | 0.07 (0.15)          |
| CCP compliers                            | 0.05 (0.15)           | 0.10 (0.25)         | 0.09 (0.27)          | 0.09 (0.21)          |
| <b>Psychological IPV ♂→♀<sup>a</sup></b> |                       |                     |                      |                      |
| Control                                  | 1.19 (0.89)           | 1.04 (0.77)         | 1.19 (0.84)          | 1.09 (0.85)          |
| CCP non-compliers                        | 1.05 (0.89)           | 0.79 (0.68)         | 1.05 (0.92)          | 0.80 (0.72)          |
| CCP compliers                            | 1.19 (0.81)           | 1.01 (0.95)         | 0.96 (0.92)          | 0.95 (0.89)          |
| <b>Psychological IPV ♀→♂<sup>a</sup></b> |                       |                     |                      |                      |
| Control                                  | 1.12 (0.95)           | 1.00 (0.83)         | 1.14 (0.93)          | 1.06 (0.89)          |
| CCP non-compliers                        | 0.95 (0.77)           | 0.66 (0.57)         | 1.42 (1.34)          | 0.92 (0.75)          |
| CCP compliers                            | 1.00 (0.83)           | 0.91 (0.91)         | 0.89 (0.90)          | 0.90 (0.96)          |
| <b>Relationship satisfaction ♂</b>       |                       |                     |                      |                      |
| Control                                  | 126.51 (23.31)        | 125.45 (24.89)      | 125.95 (26.40)       | 124.16(30.39)        |
| CCP non-compliers                        | 126.24 (23.12)        | 129.88 (23.64)      | 117.63 (22.15)       | 124.47 (23.17)       |
| CCP compliers                            | 126.47 (21.52)        | 129.15 (27.45)      | 127.22 (30.63)       | 124.64 (32.61)       |
| <b>Relationship satisfaction ♀</b>       |                       |                     |                      |                      |
| Control                                  | 123.72 (24.29)        | 123.62 (27.59)      | 123.28 (29.53)       | 120.95 (35.60)       |
| CCP non-compliers                        | 118.27 (24.59)        | 126.07 (25.90)      | 103.53 (32.58)       | 104.77 (39.98)       |
| CCP compliers                            | 120.34 (23.40)        | 122.71 (32.65)      | 123.16 (32.27)       | 119.92 (36.09)       |
| <b>Dysfunctional attributions ♂</b>      |                       |                     |                      |                      |
| Control                                  | 2.61 (0.86)           | 2.59 (0.79)         | 2.51 (0.81)          | 2.50 (0.94)          |
| CCP non-compliers                        | 2.51 (0.86)           | 2.37 (1.08)         | 2.27 (0.78)          | 2.39 (0.73)          |
| CCP compliers                            | 2.79 (0.93)           | 2.60 (0.95)         | 2.57 (1.07)          | 2.51 (1.07)          |
| <b>Dysfunctional attributions ♀</b>      |                       |                     |                      |                      |
| Control                                  | 2.61 (0.94)           | 2.87 (0.92)         | 2.63 (1.02)          | 2.75 (1.03)          |
| CCP non-compliers                        | 2.83 (0.94)           | 2.63 (0.96)         | 2.87 (1.23)          | 2.32 (0.97)          |
| CCP compliers                            | 2.91 (0.97)           | 2.99 (0.96)         | 2.78 (1.00)          | 2.69 (1.18)          |
| <b>Self-regulation ♂</b>                 |                       |                     |                      |                      |
| Control                                  | 3.56 (0.63)           | 3.47 (0.57)         | 3.52 (0.60)          | 3.61 (0.67)          |
| CCP non-compliers                        | 3.60 (0.59)           | 3.64 (0.53)         | 3.86 (0.53)          | 3.46 (0.67)          |
| CCP compliers                            | 3.49 (0.50)           | 3.39 (0.58)         | 3.47 (0.63)          | 3.48 (0.71)          |
| <b>Self-regulation ♀</b>                 |                       |                     |                      |                      |

| Outcome/Group                          | Baseline                      | Post-Program                | Follow-Ups                   |                              |
|----------------------------------------|-------------------------------|-----------------------------|------------------------------|------------------------------|
|                                        | Mos. 0-3<br>( <i>n</i> = 368) | Mos. 8<br>( <i>n</i> = 213) | Mos. 15<br>( <i>n</i> = 175) | Mos. 24<br>( <i>n</i> = 217) |
|                                        | <i>M</i> ( <i>SD</i> )        | <i>M</i> ( <i>SD</i> )      | <i>M</i> ( <i>SD</i> )       | <i>M</i> ( <i>SD</i> )       |
| Control                                | 3.57 (0.57)                   | 3.53 (0.56)                 | 3.61 (0.61)                  | 3.60 (0.60)                  |
| CCP non-compliers                      | 3.51 (0.59)                   | 3.53 (0.50)                 | 3.45 (0.59)                  | 3.45 (0.49)                  |
| CCP compliers                          | 3.56 (0.58)                   | 3.53 (0.55)                 | 3.53 (0.60)                  | 3.52 (0.74)                  |
| Collaboration ♂ <sup>b</sup>           |                               |                             |                              |                              |
| Control                                | 2.35 (0.36)                   | 2.32 (0.37)                 | 2.34 (0.42)                  | 2.34 (0.48)                  |
| CCP non-compliers                      | 2.31 (0.44)                   | 2.37 (0.29)                 | 2.23 (0.52)                  | 2.18 (0.55)                  |
| CCP compliers                          | 2.27 (0.37)                   | 2.27 (0.38)                 | 2.24 (0.33)                  | 2.29 (0.52)                  |
| Stalemate ♂ <sup>b</sup>               |                               |                             |                              |                              |
| Control                                | 0.83 (0.43)                   | 0.82 (0.44)                 | 0.77 (0.41)                  | 0.73 (0.43)                  |
| CCP non-compliers                      | 0.86 (0.48)                   | 0.76 (0.47)                 | 0.88 (0.47)                  | 0.77 (0.42)                  |
| CCP compliers                          | 0.74 (0.40)                   | 0.80 (0.43)                 | 0.73 (0.45)                  | 0.67 (0.51)                  |
| Avoidance-capitulation ♂ <sup>b</sup>  |                               |                             |                              |                              |
| Control                                | 1.48 (0.43)                   | 1.37 (0.43)                 | 1.42 (0.43)                  | 1.43 (0.47)                  |
| CCP non-compliers                      | 1.60 (0.47)                   | 1.50 (0.47)                 | 1.31 (0.43)                  | 1.46 (0.42)                  |
| CCP compliers                          | 1.54 (0.48)                   | 1.53 (0.45)                 | 1.41 (0.43)                  | 1.37 (0.50)                  |
| Child conflict exposure ♂ <sup>b</sup> |                               |                             |                              |                              |
| Control                                | 0.35 (0.38)                   | 0.47 (0.40)                 | 0.48 (0.36)                  | 0.47 (0.37)                  |
| CCP non-compliers                      | 0.32 (0.36)                   | 0.35 (0.31)                 | 0.48 (0.44)                  | 0.40 (0.33)                  |
| CCP compliers                          | 0.34 (0.39)                   | 0.43 (0.39)                 | 0.40 (0.36)                  | 0.42 (0.46)                  |
| Collaboration ♀ <sup>b</sup>           |                               |                             |                              |                              |
| Control                                | 2.40 (0.34)                   | 2.36 (0.32)                 | 2.34 (0.41)                  | 2.28 (0.54)                  |
| CCP non-compliers                      | 2.42 (0.34)                   | 2.41 (0.31)                 | 2.41 (0.29)                  | 2.34 (0.43)                  |
| CCP compliers                          | 2.38 (0.34)                   | 2.31 (0.34)                 | 2.31 (0.35)                  | 2.27 (0.56)                  |
| Stalemate ♀ <sup>b</sup>               |                               |                             |                              |                              |
| Control                                | 1.20 (0.47)                   | 1.15 (0.49)                 | 1.09 (0.44)                  | 1.03 (0.52)                  |
| CCP non-compliers                      | 1.22 (0.49)                   | 1.01 (0.42)                 | 1.20 (0.60)                  | 1.08 (0.51)                  |
| CCP compliers                          | 1.17 (0.50)                   | 1.13 (0.50)                 | 1.06 (0.57)                  | 0.97 (0.56)                  |
| Avoidance-capitulation ♀ <sup>b</sup>  |                               |                             |                              |                              |
| Control                                | 1.41 (0.39)                   | 1.37 (0.42)                 | 1.35 (0.38)                  | 1.27 (0.43)                  |
| CCP non-compliers                      | 1.49 (0.48)                   | 1.31 (0.50)                 | 1.26 (0.53)                  | 1.27 (0.35)                  |
| CCP compliers                          | 1.42 (0.50)                   | 1.38 (0.42)                 | 1.30 (0.45)                  | 1.25 (0.53)                  |
| Child conflict exposure ♀ <sup>b</sup> |                               |                             |                              |                              |
| Control                                | 0.37 (0.40)                   | 0.49 (0.39)                 | 0.47 (0.34)                  | 0.49 (0.39)                  |
| CCP non-compliers                      | 0.33 (0.36)                   | 0.38 (0.36)                 | 0.49 (0.43)                  | 0.40 (0.35)                  |
| CCP compliers                          | 0.34 (0.38)                   | 0.44 (0.41)                 | 0.43 (0.39)                  | 0.45 (0.50)                  |

*Note.* Non-compliers attended 0-3 CCP sessions; compliers attended 4-8 CCP sessions; ♂ = male; ♀ = female; except where indicated, data are self-report; <sup>a</sup> maximum reported by either partner; <sup>b</sup> average of self- and partner-report.

Table 8  
*Effects of Couple CARE for Parents on Intimate Partner Violence*

| Outcome/Time            | Intent to Treat (ITT) |                   |               |      |          | Complier Average Causal Estimation (CACE) |       |                |      |          |       |                   |               |      |          |
|-------------------------|-----------------------|-------------------|---------------|------|----------|-------------------------------------------|-------|----------------|------|----------|-------|-------------------|---------------|------|----------|
|                         | MAR                   |                   |               |      |          | MAR                                       |       |                |      |          | LI    |                   |               |      |          |
|                         | B                     | d/OR <sup>a</sup> | 95% CI        | p    | FDR<br>p | B                                         | d     | 95% CI         | p    | FDR<br>p | B     | d/OR <sup>a</sup> | 95% CI        | p    | FDR<br>p |
| Physical IPV ♂ → ♀      |                       |                   |               |      |          |                                           |       |                |      |          |       |                   |               |      |          |
| Post-program (8 mos.)   | -0.12                 | 0.83              | [0.47, 1.45]  | .504 | .504     | -0.74                                     | 0.31  | [0.10, 0.92]   | .035 | .105     | -0.38 | 0.54              | [0.20, 1.46]  | .229 | .391     |
| Follow-up (15 mos.)     | -0.14                 | 0.80              | [0.42, 1.52]  | .498 | .504     | -0.24                                     | 0.68  | [0.21, 2.22]   | .523 | .523     | -0.21 | 0.71              | [0.34, 1.53]  | .391 | .391     |
| Follow-up (24 mos.)     | 0.14                  | 1.25              | [0.68, 2.29]  | .482 | .504     | 0.33                                      | 1.70  | [0.46, 6.22]   | .432 | .523     | 0.22  | 1.42              | [0.65, 3.12]  | .383 | .391     |
| Physical IPV ♀ → ♂      |                       |                   |               |      |          |                                           |       |                |      |          |       |                   |               |      |          |
| Post-program (8 mos.)   | -0.13                 | 0.81              | [0.46, 1.43]  | .473 | .710     | -0.35                                     | 0.57  | [0.21, 1.59]   | .286 | .858     | -0.23 | 0.69              | [0.29, 1.65]  | .408 | .762     |
| Follow-up (15 mos.)     | -0.18                 | 0.75              | [0.41, 1.38]  | .349 | .710     | -0.15                                     | 0.79  | [0.22, 2.74]   | .704 | .922     | -0.16 | 0.77              | [0.36, 1.65]  | .508 | .762     |
| Follow-up (24 mos.)     | 0.01                  | 1.02              | [0.57, 1.82]  | .960 | .960     | -0.03                                     | 0.95  | [0.32, 2.80]   | .922 | .922     | -0.00 | 1.00              | [0.43, 2.33]  | .992 | .992     |
| Psychological IPV ♂ → ♀ |                       |                   |               |      |          |                                           |       |                |      |          |       |                   |               |      |          |
| Post-program (8 mos.)   | -0.09                 | -0.10             | [-0.36, 0.16] | .279 | .682     | 0.03                                      | 0.04  | [-0.22, 0.30]  | .763 | .763     | -0.01 | -0.01             | [-0.27, 0.25] | .906 | .906     |
| Follow-up (15 mos.)     | -0.09                 | -0.10             | [-0.39, 0.19] | .455 | .682     | 0.20                                      | 0.23  | [-0.06, 0.52]  | .112 | .336     | 0.10  | 0.12              | [-0.17, 0.41] | .441 | .906     |
| Follow-up (24 mos.)     | 0.01                  | 0.01              | [-0.25, 0.27] | .934 | .934     | -0.08                                     | -0.09 | [-0.35, 0.17]  | .633 | .763     | -0.03 | -0.03             | [-0.29, 0.23] | .822 | .906     |
| Psychological IPV ♀ → ♂ |                       |                   |               |      |          |                                           |       |                |      |          |       |                   |               |      |          |
| Post-program (8 mos.)   | -0.06                 | -0.07             | [-0.33, 0.19] | .449 | .449     | -0.05                                     | -0.05 | [-0.31, 0.21]  | .757 | .834     | -0.04 | -0.04             | [-0.3, 0.22]  | .742 | .742     |
| Follow-up (15 mos.)     | -0.17                 | -0.19             | [-0.48, 0.1]  | .106 | .318     | 0.03                                      | 0.04  | [-0.25, 0.33]  | .834 | .834     | -0.05 | -0.06             | [-0.35, 0.23] | .688 | .742     |
| Follow-up (24 mos.)     | -0.08                 | -0.09             | [-0.35, 0.17] | .402 | .449     | -0.29                                     | -0.32 | [-0.58, -0.06] | .081 | .243     | -0.15 | -0.17             | [-0.43, 0.09] | .262 | .742     |

Notes.  $n = 368$ ; IPV = intimate partner violence, as reported by either partner; ♂ = male; ♀ = female;  $B$  = regression coefficient for the intervention effect in ITT analysis, or regression coefficient for the intervention effect in the complier class in CACE analysis;  $d$  = Cohen's  $d$  (standardized difference between groups); FDR  $p$  = false discovery rate (Benjamini & Hochberg, 1995) technique-corrected  $p$ -value for the intervention effect; two-tailed; MAR = missing at random; LI = latent ignorability.

<sup>a</sup> Odds ratio reported for physical IPV, as  $d$  cannot be computed for physical IPV (an ordinal outcome).

Table 9  
*Effects of Couple CARE for Parents on Couple Relationship Outcomes)*

| Outcome/Time                 | Intent to Treat (ITT) |       |               |      |       | Complier Average Causal Estimation (CACE) |       |                |      |       |       |       |                |      |       |
|------------------------------|-----------------------|-------|---------------|------|-------|-------------------------------------------|-------|----------------|------|-------|-------|-------|----------------|------|-------|
|                              | MAR                   |       |               |      |       | MAR                                       |       |                |      |       | LI    |       |                |      |       |
|                              | B                     | d     | 95% CI        | p    | FDR p | B                                         | d     | 95% CI         | p    | FDR p | B     | d     | 95% CI         | p    | FDR p |
| Main Effects of CCP Program  |                       |       |               |      |       |                                           |       |                |      |       |       |       |                |      |       |
| Relationship satisfaction ♂  |                       |       |               |      |       |                                           |       |                |      |       |       |       |                |      |       |
| Post-program (8 mos.)        | 1.49                  | 0.06  | [-0.21, 0.33] | .587 | .880  | 5.55                                      | 0.24  | [-0.03, 0.51]  | .211 | .211  | -0.34 | -0.01 | [-0.28, 0.26]  | .950 | .950  |
| Follow-up (15 mos.)          | 2.16                  | 0.09  | [-0.21, 0.39] | .509 | .880  | 10.87                                     | 0.47  | [0.17, 0.77]   | .077 | .211  | 7.43  | 0.32  | [0.02, 0.62]   | .220 | .330  |
| Follow-up (24 mos.)          | -0.46                 | -0.02 | [-0.29, 0.25] | .895 | .895  | -4.76                                     | -0.21 | [-0.48, 0.06]  | .169 | .211  | -5.27 | -0.23 | [-0.50, 0.04]  | .122 | .330  |
| Relationship satisfaction ♀  |                       |       |               |      |       |                                           |       |                |      |       |       |       |                |      |       |
| Post-program (8 mos.)        | 0.91                  | 0.04  | [-0.23, 0.31] | .753 | .753  | 7.57                                      | 0.31  | [0.04, 0.58]   | .064 | .096  | 4.37  | 0.18  | [-0.09, 0.45]  | .244 | .292  |
| Follow-up (15 mos.)          | -2.39                 | -0.10 | [-0.39, 0.19] | .517 | .753  | -5.24                                     | -0.22 | [-0.51, 0.07]  | .161 | .161  | -3.96 | -0.16 | [-0.45, 0.13]  | .292 | .292  |
| Follow-up (24 mos.)          | -3.08                 | -0.13 | [-0.39, 0.13] | .453 | .753  | -7.96                                     | -0.33 | [-0.59, -0.07] | .024 | .072  | -7.07 | -0.29 | [-0.55, -0.03] | .051 | .153  |
| Dysfunctional attributions ♂ |                       |       |               |      |       |                                           |       |                |      |       |       |       |                |      |       |
| Post-program (8 mos.)        | -0.05                 | -0.06 | [-0.33, 0.21] | .666 | .908  | -0.20                                     | -0.23 | [-0.50, 0.04]  | .225 | .675  | -0.14 | -0.16 | [-0.43, 0.11]  | .372 | .802  |
| Follow-up (15 mos.)          | 0.05                  | 0.06  | [-0.24, 0.36] | .730 | .908  | 0.08                                      | 0.09  | [-0.21, 0.39]  | .696 | .732  | 0.05  | 0.06  | [-0.24, 0.36]  | .724 | .802  |
| Follow-up (24 mos.)          | 0.01                  | 0.01  | [-0.27, 0.29] | .908 | .908  | -0.07                                     | -0.08 | [-0.36, 0.20]  | .732 | .732  | -0.04 | 0.05  | [-0.23, 0.33]  | .802 | .802  |
| Dysfunctional attributions ♀ |                       |       |               |      |       |                                           |       |                |      |       |       |       |                |      |       |
| Post-program (8 mos.)        | 0.00                  | 0.00  | [-0.27, 0.27] | .970 | .970  | -0.07                                     | -0.07 | [-0.34, 0.20]  | .611 | .611  | -0.04 | -0.04 | [-0.31, 0.23]  | .750 | .750  |
| Follow-up (15 mos.)          | 0.12                  | 0.01  | [-0.28, 0.30] | .377 | .566  | 0.16                                      | 0.17  | [-0.12, 0.46]  | .225 | .338  | 0.19  | 0.20  | [-0.09, 0.49]  | .148 | .288  |
| Follow-up (24 mos.)          | -0.16                 | -0.17 | [-0.44, 0.10] | .212 | .566  | -0.26                                     | -0.27 | [-0.54, 0.00]  | .171 | .338  | -0.22 | -0.23 | [-0.50, 0.04]  | .192 | .288  |
| Self-regulation ♂            |                       |       |               |      |       |                                           |       |                |      |       |       |       |                |      |       |
| Post-program (8 mos.)        | -0.08                 | -0.14 | [-0.41, 0.13] | .198 | .297  | -0.19                                     | -0.33 | [-0.60, -0.06] | .161 | .242  | -0.14 | -0.24 | [-0.51, 0.03]  | .164 | .246  |
| Follow-up (15 mos.)          | -0.01                 | -0.01 | [-0.31, 0.29] | .936 | .936  | -0.02                                     | -0.03 | [-0.33, 0.27]  | .907 | .907  | 0.00  | 0.00  | [-0.30, 0.30]  | >.99 | >.99  |
| Follow-up (24 mos.)          | -0.13                 | -0.23 | [-0.50, 0.04] | .087 | .261  | -0.17                                     | -0.29 | [-0.56, -0.02] | .103 | .242  | -0.14 | -0.23 | [-0.50, 0.04]  | .134 | .246  |
| Self-regulation ♀            |                       |       |               |      |       |                                           |       |                |      |       |       |       |                |      |       |
| Post-program (8 mos.)        | -0.01                 | -0.02 | [-0.29, 0.25] | .893 | .893  | 0.06                                      | 0.11  | [-0.16, 0.38]  | .714 | .714  | 0.05  | 0.09  | [-0.18, 0.36]  | .693 | .693  |

| Outcome/Time                    | Intent to Treat (ITT) |       |               |      |       | Complier Average Causal Estimation (CACE) |       |                |      |       |       |       |                |      |       |
|---------------------------------|-----------------------|-------|---------------|------|-------|-------------------------------------------|-------|----------------|------|-------|-------|-------|----------------|------|-------|
|                                 | MAR                   |       |               |      |       | MAR                                       |       |                |      |       | LI    |       |                |      |       |
|                                 | B                     | d     | 95% CI        | p    | FDR p | B                                         | d     | 95% CI         | p    | FDR p | B     | d     | 95% CI         | p    | FDR p |
| Follow-up (15 mos.)             | -0.09                 | -0.15 | [-0.44, 0.14] | .285 | .428  | -0.14                                     | -0.25 | [-0.54, 0.04]  | .295 | .442  | -0.10 | -0.17 | [-0.46, 0.12]  | .313 | .470  |
| Follow-up (24 mos.)             | -0.12                 | -0.21 | [-0.47, 0.05] | .118 | .354  | -0.17                                     | -0.30 | [-0.57, -0.03] | .138 | .414  | -0.12 | -0.20 | [-0.46, 0.06]  | .248 | .470  |
| Collaboration ♂                 |                       |       |               |      |       |                                           |       |                |      |       |       |       |                |      |       |
| Post-program (8 mos.)           | -0.02                 | -0.05 | [-0.31, 0.21] | .607 | .701  | 0.00                                      | 0.00  | [-0.26, 0.26]  | .994 | .994  | -0.01 | -0.03 | [-0.29, 0.23]  | .828 | .828  |
| Follow-up (15 mos.)             | -0.02                 | -0.05 | [-0.34, 0.24] | .701 | .701  | -0.13                                     | -0.33 | [-0.62, -0.04] | .002 | .006* | -0.10 | -0.27 | [-0.56, 0.02]  | .017 | .051  |
| Follow-up (24 mos.)             | -0.07                 | -0.18 | [-0.44, 0.08] | .272 | .701  | -0.13                                     | -0.34 | [-0.60, -0.08] | .014 | .021* | -0.11 | -0.29 | [-0.55, -0.03] | .050 | .075  |
| Stalemate ♂                     |                       |       |               |      |       |                                           |       |                |      |       |       |       |                |      |       |
| Post-program (8 mos.)           | 0.01                  | 0.03  | [-0.23, 0.29] | .746 | .941  | -0.02                                     | -0.05 | [-0.31, 0.21]  | .838 | .838  | -0.01 | -0.03 | [-0.29, 0.23]  | .854 | .990  |
| Follow-up (15 mos.)             | -0.00                 | -0.01 | [-0.30, 0.28] | .941 | .941  | 0.02                                      | 0.04  | [-0.25, 0.33]  | .812 | .838  | -0.00 | 0.00  | [-0.29, 0.29]  | .990 | .990  |
| Follow-up (24 mos.)             | -0.02                 | -0.05 | [-0.31, 0.21] | .639 | .941  | -0.06                                     | -0.14 | [-0.40, 0.12]  | .482 | .838  | -0.04 | -0.09 | [-0.35, 0.17]  | .548 | .990  |
| Avoidance-capitulation ♂        |                       |       |               |      |       |                                           |       |                |      |       |       |       |                |      |       |
| Post-program (8 mos.)           | 0.04                  | 0.08  | [-0.18, 0.34] | .439 | .602  | 0.05                                      | 0.11  | [-0.15, 0.37]  | .425 | .425  | 0.03  | 0.07  | [-0.19, 0.33]  | .543 | .543  |
| Follow-up (15 mos.)             | -0.03                 | -0.06 | [-0.35, 0.23] | .602 | .602  | -0.06                                     | -0.12 | [-0.41, 0.17]  | .382 | .425  | -0.04 | -0.09 | [-0.38, 0.20]  | .447 | .543  |
| Follow-up (24 mos.)             | -0.06                 | -0.14 | [-0.40, 0.12] | .254 | .602  | -0.09                                     | -0.19 | [-0.45, 0.07]  | .320 | .425  | -0.09 | -0.20 | [-0.46, 0.06]  | .200 | .543  |
| Child involvement in conflict ♂ |                       |       |               |      |       |                                           |       |                |      |       |       |       |                |      |       |
| Post-program (8 mos.)           | -0.05                 | -0.13 | [-0.39, 0.13] | .271 | .406  | -0.16                                     | -0.43 | [-0.7, -0.16]  | .027 | .081  | -0.12 | -0.32 | [-0.59, -0.05] | .074 | .222  |
| Follow-up (15 mos.)             | -0.05                 | -0.14 | [-0.43, 0.15] | .260 | .406  | -0.03                                     | -0.08 | [-0.37, 0.21]  | .587 | .587  | -0.04 | -0.10 | [-0.39, 0.19]  | .480 | .480  |
| Follow-up (24 mos.)             | -0.03                 | -0.09 | [-0.35, 0.17] | .486 | .486  | -0.10                                     | -0.26 | [-0.52, 0.00]  | .356 | .534  | -0.07 | -0.19 | [-0.45, 0.07]  | .283 | .424  |
| Collaboration ♀                 |                       |       |               |      |       |                                           |       |                |      |       |       |       |                |      |       |
| Post-program (8 mos.)           | -0.03                 | -0.10 | [-0.36, 0.16] | .368 | .937  | 0.04                                      | 0.10  | [-0.16, 0.36]  | .689 | .689  | -0.01 | -0.03 | [-0.29, 0.23]  | .893 | .893  |
| Follow-up (15 mos.)             | -0.01                 | -0.03 | [-0.32, 0.26] | .815 | .937  | -0.14                                     | -0.40 | [-0.69, -0.11] | .007 | .021* | -0.11 | -0.33 | [-0.62, -0.04] | .024 | .072  |
| Follow-up (24 mos.)             | 0.00                  | 0.01  | [-0.25, 0.27] | .937 | .937  | 0.17                                      | 0.50  | [0.24, 0.76]   | .173 | .259  | 0.10  | 0.29  | [0.03, 0.55]   | .368 | .552  |
| Stalemate ♀                     |                       |       |               |      |       |                                           |       |                |      |       |       |       |                |      |       |
| Post-program (8 mos.)           | -0.00                 | -0.01 | [-0.27, 0.25] | .877 | .991  | -0.10                                     | -0.21 | [-0.47, 0.05]  | .238 | .714  | -0.07 | -0.14 | [-0.40, 0.12]  | .233 | .699  |

| Outcome/Time                       | Intent to Treat (ITT) |       |               |      |       | Complier Average Causal Estimation (CACE) |       |               |      |       |       |       |               |      |       |
|------------------------------------|-----------------------|-------|---------------|------|-------|-------------------------------------------|-------|---------------|------|-------|-------|-------|---------------|------|-------|
|                                    | MAR                   |       |               |      |       | MAR                                       |       |               |      |       | LI    |       |               |      |       |
|                                    | B                     | d     | 95% CI        | p    | FDR p | B                                         | d     | 95% CI        | p    | FDR p | B     | d     | 95% CI        | p    | FDR p |
| Follow-up (15 mos.)                | 0.00                  | 0.00  | [-0.29, 0.29] | .991 | .991  | -0.00                                     | 0.00  | [-0.29, 0.29] | .993 | .993  | 0.01  | 0.03  | [-0.26, 0.32] | .853 | .853  |
| Follow-up (24 mos.)                | -0.00                 | 0.00  | [-0.26, 0.26] | .978 | .991  | -0.02                                     | -0.05 | [-0.31, 0.21] | .823 | .993  | -0.04 | -0.07 | [-0.33, 0.19] | .622 | .853  |
| Avoidance-capitulation ♀           |                       |       |               |      |       |                                           |       |               |      |       |       |       |               |      |       |
| Post-program (8 mos.)              | 0.03                  | 0.07  | [-0.19, 0.33] | .520 | .662  | 0.00                                      | 0.01  | [-0.25, 0.27] | .956 | .956  | 0.01  | 0.02  | [-0.24, 0.28] | .925 | .925  |
| Follow-up (15 mos.)                | -0.05                 | -0.11 | [-0.40, 0.18] | .354 | .662  | -0.12                                     | -0.26 | [-0.55, 0.03] | .121 | .363  | -0.07 | -0.16 | [-0.45, 0.13] | .364 | .726  |
| Follow-up (24 mos.)                | -0.02                 | -0.05 | [-0.31, 0.21] | .662 | .662  | -0.04                                     | -0.10 | [-0.36, 0.16] | .590 | .885  | -0.05 | -0.11 | [-0.37, 0.15] | .484 | .726  |
| Child involvement in conflict ♀    |                       |       |               |      |       |                                           |       |               |      |       |       |       |               |      |       |
| Post-program (8 mos.)              | -0.04                 | -0.10 | [-0.36, 0.16] | .383 | .798  | -0.03                                     | -0.08 | [-0.34, 0.18] | .606 | .606  | -0.02 | -0.05 | [-0.31, 0.21] | .715 | .715  |
| Follow-up (15 mos.)                | -0.01                 | -0.03 | [-0.32, 0.26] | .798 | .798  | -0.04                                     | -0.11 | [-0.40, 0.18] | .492 | .606  | -0.04 | -0.10 | [-0.39, 0.19] | .464 | .715  |
| Follow-up (24 mos.)                | -0.01                 | -0.04 | [-0.30, 0.22] | .788 | .798  | -0.08                                     | -0.22 | [-0.48, 0.04] | .445 | .606  | -0.05 | -0.13 | [-0.39, 0.13] | .510 | .715  |
| CCP × Cumulative Risk <sup>a</sup> |                       |       |               |      |       |                                           |       |               |      |       |       |       |               |      |       |
| Relationship satisfaction ♂        |                       |       |               |      |       |                                           |       |               |      |       |       |       |               |      |       |
| Post-program (8 mos.)              | -3.43                 | -     | -             | .216 | .644  | 5.52                                      | -     | -             | .529 | .529  | -6.48 | -     | -             | .028 | .055  |
| Follow-up (15 mos.)                | 0.18                  | -     | -             | .968 | .968  | -6.63                                     | -     | -             | .298 | .529  | -6.06 | -     | -             | .328 | .328  |
| Follow-up (24 mos.)                | -3.31                 | -     | -             | .429 | .644  | 5.59                                      | -     | -             | .435 | .529  | -9.92 | -     | -             | .037 | .055  |
| Relationship satisfaction ♀        |                       |       |               |      |       |                                           |       |               |      |       |       |       |               |      |       |
| Post-program (8 mos.)              | -1.15                 | -     | -             | .685 | .685  | 7.22                                      | -     | -             | .243 | .243  | 2.05  | -     | -             | .841 | .841  |
| Follow-up (15 mos.)                | -3.96                 | -     | -             | .31  | .685  | -8.56                                     | -     | -             | .029 | .087  | -7.38 | -     | -             | .087 | .261  |
| Follow-up (24 mos.)                | -2.03                 | -     | -             | .638 | .685  | -7.28                                     | -     | -             | .159 | .238  | -5.35 | -     | -             | .292 | .438  |
| Dysfunctional attributions ♂       |                       |       |               |      |       |                                           |       |               |      |       |       |       |               |      |       |
| Post-program (8 mos.)              | 0.1                   | -     | -             | .432 | .432  | -0.02                                     | -     | -             | .912 | .912  | 0.03  | -     | -             | .867 | .867  |
| Follow-up (15 mos.)                | 0.2                   | -     | -             | .236 | .432  | 0.26                                      | -     | -             | .339 | .588  | 0.33  | -     | -             | .103 | .309  |
| Follow-up (24 mos.)                | 0.12                  | -     | -             | .38  | .432  | 0.21                                      | -     | -             | .392 | .588  | 0.23  | -     | -             | .234 | .351  |
| Dysfunctional attributions ♀       |                       |       |               |      |       |                                           |       |               |      |       |       |       |               |      |       |

| Outcome/Time                    | Intent to Treat (ITT) |   |        |      |       | Complier Average Causal Estimation (CACE) |   |        |      |       |       |   |        |      |       |
|---------------------------------|-----------------------|---|--------|------|-------|-------------------------------------------|---|--------|------|-------|-------|---|--------|------|-------|
|                                 | MAR                   |   |        |      |       | MAR                                       |   |        |      |       | LI    |   |        |      |       |
|                                 | B                     | d | 95% CI | p    | FDR p | B                                         | d | 95% CI | p    | FDR p | B     | d | 95% CI | p    | FDR p |
| Post-program (8 mos.)           | -0.01                 | - | -      | .958 | .975  | -0.13                                     | - | -      | .500 | .531  | -0.1  | - | -      | .463 | .541  |
| Follow-up (15 mos.)             | 0.01                  | - | -      | .975 | .975  | -0.14                                     | - | -      | .531 | .531  | -0.11 | - | -      | .465 | .541  |
| Follow-up (24 mos.)             | 0.12                  | - | -      | .343 | .975  | 0.16                                      | - | -      | .436 | .531  | 0.11  | - | -      | .541 | .541  |
| Self-regulation ♂               |                       |   |        |      |       |                                           |   |        |      |       |       |   |        |      |       |
| Post-program (8 mos.)           | 0.05                  | - | -      | .456 | .684  | -0.14                                     | - | -      | .369 | .708  | -0.03 | - | -      | .854 | .999  |
| Follow-up (15 mos.)             | 0.09                  | - | -      | .305 | .684  | -0.11                                     | - | -      | .540 | .708  | 0     | - | -      | .999 | .999  |
| Follow-up (24 mos.)             | 0.03                  | - | -      | .791 | .791  | 0.05                                      | - | -      | .708 | .708  | 0.08  | - | -      | .552 | .999  |
| Self-regulation ♀               |                       |   |        |      |       |                                           |   |        |      |       |       |   |        |      |       |
| Post-program (8 mos.)           | -0.04                 | - | -      | .538 | .948  | 0.05                                      | - | -      | .773 | .905  | 0.02  | - | -      | .921 | .975  |
| Follow-up (15 mos.)             | -0.01                 | - | -      | .948 | .948  | -0.03                                     | - | -      | .905 | .905  | 0     | - | -      | .975 | .975  |
| Follow-up (24 mos.)             | -0.02                 | - | -      | .796 | .948  | 0.03                                      | - | -      | .813 | .905  | 0.03  | - | -      | .799 | .975  |
| Collaboration ♂                 |                       |   |        |      |       |                                           |   |        |      |       |       |   |        |      |       |
| Post-program (8 mos.)           | 0.07                  | - | -      | .111 | .333  | 0.01                                      | - | -      | .937 | .993  | 0.05  | - | -      | .356 | .534  |
| Follow-up (15 mos.)             | -0.01                 | - | -      | .810 | .810  | 0.03                                      | - | -      | .675 | .993  | 0.05  | - | -      | .337 | .534  |
| Follow-up (24 mos.)             | -0.02                 | - | -      | .810 | .810  | 0.02                                      | - | -      | .993 | .993  | 0.03  | - | -      | .738 | .738  |
| Stalemate ♂                     |                       |   |        |      |       |                                           |   |        |      |       |       |   |        |      |       |
| Post-program (8 mos.)           | 0.02                  | - | -      | .616 | .616  | -0.06                                     | - | -      | .575 | .575  | -0.01 | - | -      | .830 | .926  |
| Follow-up (15 mos.)             | 0.09                  | - | -      | .078 | .234  | 0.13                                      | - | -      | .176 | .528  | 0.10  | - | -      | .081 | .243  |
| Follow-up (24 mos.)             | 0.03                  | - | -      | .583 | .616  | 0.06                                      | - | -      | .443 | .575  | 0.01  | - | -      | .926 | .926  |
| Avoidance-capitulation ♂        |                       |   |        |      |       |                                           |   |        |      |       |       |   |        |      |       |
| Post-program (8 mos.)           | -0.01                 | - | -      | .904 | .904  | -0.01                                     | - | -      | .958 | .958  | -0.02 | - | -      | .839 | .84   |
| Follow-up (15 mos.)             | 0.02                  | - | -      | .659 | .904  | -0.03                                     | - | -      | .712 | .958  | -0.01 | - | -      | .840 | .84   |
| Follow-up (24 mos.)             | -0.04                 | - | -      | .466 | .904  | -0.11                                     | - | -      | .174 | .522  | -0.12 | - | -      | .090 | .27   |
| Child involvement in conflict ♂ |                       |   |        |      |       |                                           |   |        |      |       |       |   |        |      |       |
| Post-program (8 mos.)           | -0.01                 | - | -      | .921 | .921  | 0.06                                      | - | -      | .489 | .489  | -0.04 | - | -      | .759 | .759  |



| Outcome/Time                    | Intent to Treat (ITT) |   |        |      |        | Complier Average Causal Estimation (CACE) |   |        |      |       | LI    |   |        |      |       |
|---------------------------------|-----------------------|---|--------|------|--------|-------------------------------------------|---|--------|------|-------|-------|---|--------|------|-------|
|                                 | MAR                   |   |        |      |        | MAR                                       |   |        |      |       | LI    |   |        |      |       |
|                                 | B                     | d | 95% CI | p    | FDR p  | B                                         | d | 95% CI | p    | FDR p | B     | d | 95% CI | p    | FDR p |
| Follow-up (15 mos.)             | 0.11                  | - | -      | .035 | .068   | 0.08                                      | - | -      | .205 | .362  | 0.08  | - | -      | .204 | .306  |
| Follow-up (24 mos.)             | 0.08                  | - | -      | .045 | .068   | 0.1                                       | - | -      | .241 | .362  | 0.07  | - | -      | .170 | .306  |
| Child involvement in conflict ♀ |                       |   |        |      |        |                                           |   |        |      |       |       |   |        |      |       |
| Post-program (8 mos.)           | -0.04                 | - | -      | .342 | .816   | 0.07                                      | - | -      | .430 | .574  | -0.07 | - | -      | .328 | .982  |
| Follow-up (15 mos.)             | 0.01                  | - | -      | .816 | .816   | -0.05                                     | - | -      | .574 | .574  | -0.02 | - | -      | .698 | .982  |
| Follow-up (24 mos.)             | -0.04                 | - | -      | .596 | .816   | 0.13                                      | - | -      | .508 | .574  | 0.01  | - | -      | .982 | .982  |
| Stalemate ♀                     |                       |   |        |      |        |                                           |   |        |      |       |       |   |        |      |       |
| Post-program (8 mos.)           | 0                     | - | -      | .989 | .989   | -0.12                                     | - | -      | .099 | .149  | -0.05 | - | -      | .473 | .71   |
| Follow-up (15 mos.)             | 0.11                  | - | -      | .071 | .213   | 0.14                                      | - | -      | .088 | .149  | 0.13  | - | -      | .088 | .264  |
| Follow-up (24 mos.)             | 0.01                  | - | -      | .825 | .989   | 0.03                                      | - | -      | .840 | .840  | -0.02 | - | -      | .833 | .833  |
| Avoidance-capitulation ♀        |                       |   |        |      |        |                                           |   |        |      |       |       |   |        |      |       |
| Post-program (8 mos.)           | -0.01                 | - | -      | .821 | .821   | -0.23                                     | - | -      | .039 | .117  | -0.10 | - | -      | .312 | .621  |
| Follow-up (15 mos.)             | 0.05                  | - | -      | .405 | .821   | -0.11                                     | - | -      | .327 | .491  | 0.03  | - | -      | .740 | .74   |
| Follow-up (24 mos.)             | -0.02                 | - | -      | .778 | .821   | -0.05                                     | - | -      | .530 | .503  | -0.06 | - | -      | .414 | .621  |
| Child involvement in conflict ♀ |                       |   |        |      |        |                                           |   |        |      |       |       |   |        |      |       |
| Post-program (8 mos.)           | -0.02                 | - | -      | .712 | .712   | 0.02                                      | - | -      | .765 | .765  | 0.02  | - | -      | .692 | .692  |
| Follow-up (15 mos.)             | 0.15                  | - | -      | .002 | .006** | 0.15                                      | - | -      | .068 | .204  | 0.15  | - | -      | .019 | .057  |
| Follow-up (24 mos.)             | 0.11                  | - | -      | .042 | .063   | 0.12                                      | - | -      | .206 | .309  | 0.11  | - | -      | .114 | .171  |

Notes.  $n = 368$ ;  $B$  is regression coefficient for the intervention effect in ITT analysis, or it is regression coefficient for the intervention effect in the complier class in CACE analysis;  $d$  is Cohen's  $d$  (standardized difference between groups);  $p$  is  $p$ -value for intervention effect; FDR  $p$  is the false discovery rate-corrected (Benjamini & Hochberg, 1995)  $p$ -value for the intervention effect; two-tailed;  $d$  cannot be computed for ordinal outcomes; MAR = missing at random; LI = latent ignorability. ♂ = male; ♀ = female.

<sup>a</sup> Effect sizes from interaction effects are not shown because their calculation in CACE models is not well developed.

\* FDR  $p < .05$ ; \*\* FDR  $p < .01$

Table 10  
*Cumulative Risk as a Moderator of Effects of Couple CARE for Parents on Intimate Partner Violence<sup>a</sup>*

| Outcome               | Intent to Treat (ITT) |          |              | Complier Average Causal Estimation (CACE) |          |              |          |          |              |
|-----------------------|-----------------------|----------|--------------|-------------------------------------------|----------|--------------|----------|----------|--------------|
|                       | MAR                   |          |              | MAR                                       |          |              | LI       |          |              |
|                       | <i>B</i>              | <i>p</i> | FDR <i>p</i> | <i>B</i>                                  | <i>p</i> | FDR <i>p</i> | <i>B</i> | <i>p</i> | FDR <i>p</i> |
| Physical IPV ♂→♀      |                       |          |              |                                           |          |              |          |          |              |
| Post-program (8 mos.) | 0.31                  | .137     | .327         | 1.38                                      | .033     | .099         | 1.16     | .009     | .027*        |
| Follow-up (15 mos.)   | 0.25                  | .218     | .327         | 0.57                                      | .149     | .223         | 0.39     | .129     | .194         |
| Follow-up (24 mos.)   | -0.13                 | .480     | .480         | -0.26                                     | .880     | .880         | -0.08    | .801     | .801         |
| Physical IPV ♀→♂      |                       |          |              |                                           |          |              |          |          |              |
| Post-program (8 mos.) | 0.17                  | .372     | .953         | 0.11                                      | .694     | .995         | 0.21     | .435     | .766         |
| Follow-up (15 mos.)   | 0.01                  | .953     | .953         | -0.06                                     | .875     | .995         | 0.08     | .730     | .766         |
| Follow-up (24 mos.)   | 0.07                  | .694     | .953         | -0.00                                     | .995     | .995         | 0.07     | .766     | .766         |
| Psychological IPV ♂→♀ |                       |          |              |                                           |          |              |          |          |              |
| Post-program (8 mos.) | -0.19                 | .037     | .111         | 0.06                                      | .736     | .736         | -0.27    | .057     | .171         |
| Follow-up (15 mos.)   | 0.11                  | .419     | .419         | 0.21                                      | .150     | .450         | 0.14     | .225     | .338         |
| Follow-up (24 mos.)   | 0.07                  | .401     | .419         | 0.11                                      | .463     | .694         | 0.09     | .460     | .460         |
| Psychological IPV ♀→♂ |                       |          |              |                                           |          |              |          |          |              |
| Post-program (8 mos.) | 0.01                  | .905     | .905         | -0.13                                     | .294     | .441         | -0.04    | .810     | .810         |
| Follow-up (15 mos.)   | 0.04                  | .692     | .905         | 0.19                                      | .201     | .441         | 0.07     | .575     | .810         |
| Follow-up (24 mos.)   | 0.07                  | .451     | .905         | 0.01                                      | .936     | .936         | 0.11     | .377     | .810         |

Notes. *n* = 368; IPV = intimate partner violence, as reported by either partner; ♂ = male; ♀ = female; *B* = regression coefficient for the intervention effect in ITT analysis, or regression coefficient for the intervention effect in the complier class in CACE analysis; FDR *p* = false discovery rate (Benjamini & Hochberg, 1995) technique-corrected *p*-value for the intervention effect; two-tailed; MAR = missing at random; LI = latent ignorability.

<sup>a</sup> Effect sizes from interaction effects are not shown because their calculation in CACE models is not well developed.

Table 11  
*Intervention × Risk Factor Interactions for Male-to-Female Physical IPV at Post-Program (8 Mos.)<sup>a</sup>*

| Predictor                          | Intent to Treat (ITT) |          | Complier Average Causal Estimation (CACE) |          |          |          |
|------------------------------------|-----------------------|----------|-------------------------------------------|----------|----------|----------|
|                                    | MAR                   |          | MAR                                       |          | LI       |          |
|                                    | <i>B</i>              | <i>p</i> | <i>B</i>                                  | <i>p</i> | <i>B</i> | <i>p</i> |
| Physical IPV (baseline)            | 1.06                  | .054     | -0.12                                     | .941     | -0.8     | .621     |
| Low education                      | 0.45                  | .238     | 1.06                                      | .230     | 0.54     | .215     |
| Parent-infant bonding <sup>b</sup> | 0.55                  | .196     | -0.05                                     | .979     | 0.33     | .535     |
| Poverty                            | -0.15                 | .723     | -1.84                                     | .319     | -0.023   | .958     |
| Unplanned pregnancy                | 1.14                  | .004**   | 3.18                                      | .005**   | 1.12     | .009**   |

*Notes.*  $n = 368$ ; IPV = intimate partner violence, as reported by either partner; *B* = regression coefficient for the moderated intervention effect in ITT analysis, or regression coefficient for the moderated intervention effect in the complier class in CACE analysis; MAR = missing at random; LI = latent ignorability.

<sup>a</sup> Effect sizes from interaction effects are not shown because their calculation in CACE models is not well developed. <sup>b</sup> The parent-infant bonding score was the mean standardized item average scores of Postpartum Bonding Questionnaire (PBQ; Brockington, Fraser, & Wilson, 2006), Parent-Infant Attachment Scale (PAS; Condon & Corkindale, 1998), and Mother to Infant Bonding Scale (IBS; Taylor, Atkins, Kumar, Adams, & Glover, 2005). Higher scores indicate worse parent-child bonding.

\*\*  $p < .01$ .

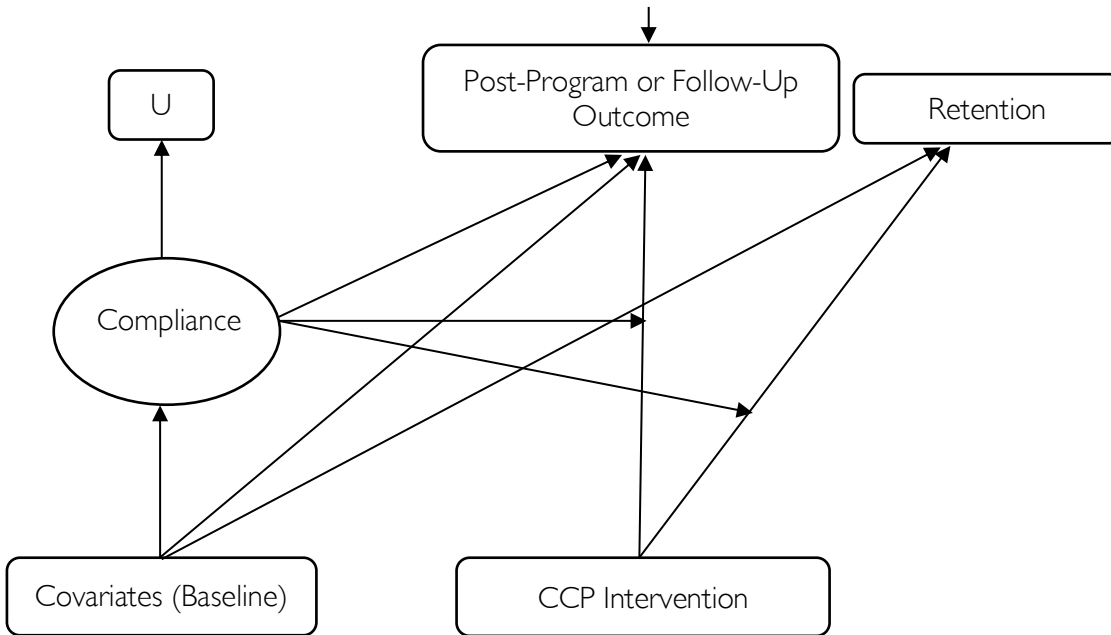

*Figure 2.* A path diagram of CACE analysis. U = observed compliance status (0 = noncompliance, 1 = compliance); Compliance = latent compliance status; Covariates (Baseline) = baseline measures; CCP Intervention = CCP intervention assignment (0 = control, 1 = intervention); Retention = retention status at post-program or follow-up assessment (0 = absent, 1 = present); Post-Program or Follow-Up Outcome = single outcome measured at post-program, 6-mos. follow-up, or 16-mos. follow-up.

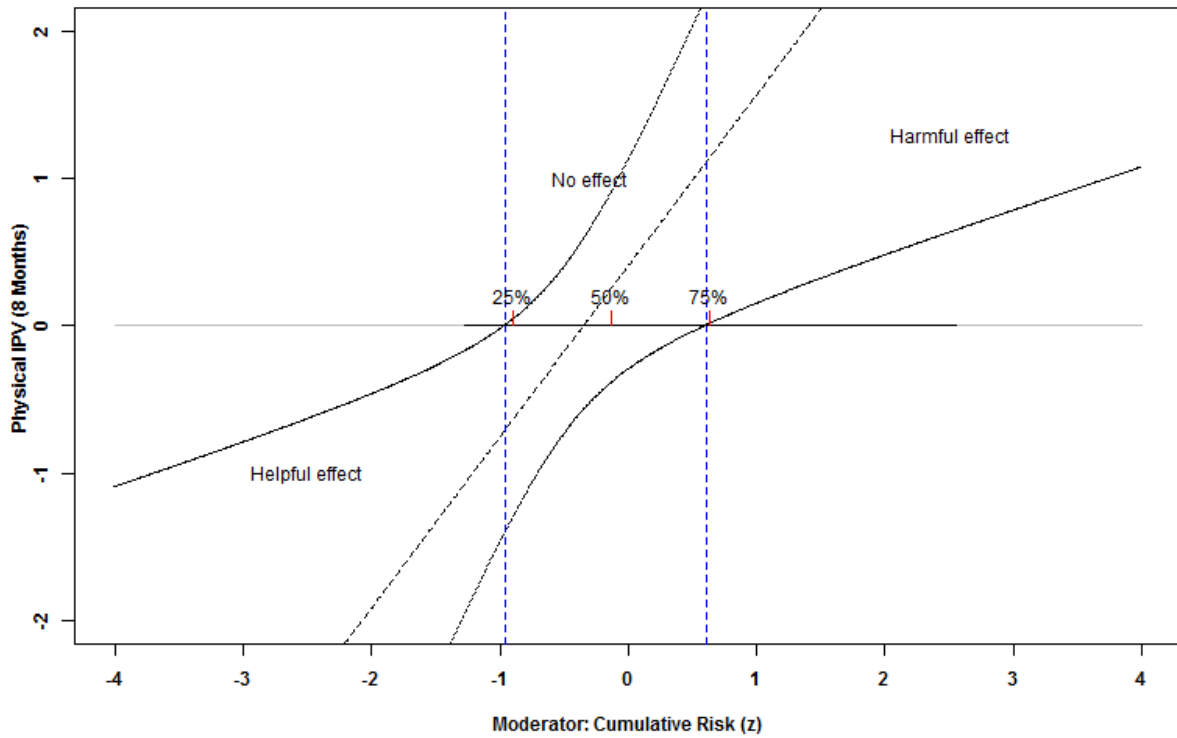

Figure 3. Intervention effect on males' physical IPV (post-program) as a function of cumulative risk. J-N Regions of significance and confidence bands (the curved black lines) for conditional relation (the tilted dashed line) between males' physical IPV and cumulative risk as a function of CCP at post-program. Black horizontal line: the range of observed cumulative risk values with 25%, 50% 75% percentiles marked. Dotted vertical lines: J-N regions of significance (-0.955, 0.612).

## Online Supplement References

- Benjamini, Y., & Hochberg, Y. (1995). Controlling the false discovery rate: A practical and powerful approach to multiple testing. *Journal of the Royal Statistical Society Series B*, 57, 289–300.
- Brockington, I. F., Fraser, C., & Wilson, D. (2006). The Postpartum Bonding Questionnaire: A validation. *Archives of Women's Mental Health*, 9, 233-242. doi:10.1007/s00737-006-0132-1
- Condon, J. T., & Corkindale, J. C. (1998). The assessment of parent-to-infant attachment: Development of a self-report questionnaire instrument. *Journal of Reproductive and Infant Psychology*, 16, 57-76. doi:10.1080/02646839808404558
- Gartstein, M. A., & Rothbart, M. K. (2003). Studying infant temperament via the Revised Infant Behavior Questionnaire. *Infant Behavior and Development*, 26, 64-86. doi:10.1016/S0163-6383(02)00169-8
- Huang, S., Cordova, D., Estrada, Y., Brincks, A. M., Asfour, L. S., & Prado, G. (2014). An application of the Complier Average Causal Effect analysis to examine the effects of a family intervention in reducing illicit drug use among high-risk Hispanic adolescents. *Family Process*, 53, 336-347. doi:10.1111/famp.12068
- Jo, B., & Muthén, B. O. (2001). Modeling of intervention effects with noncompliance: A latent variable approach for randomized trials. In G. A. Marcoulides & R. E. Schumacker (Eds.), *New developments and techniques in structural equation modeling* (pp. 57-87). London: Lawrence Erlbaum Associates.
- Jo, B., Ginexi, E. M., & Ialongo, N. S. (2010). Handling missing data in randomized experiments with noncompliance. *Prevention Science*, 11, 384-396. doi:10.1007/s11121-010-0175-4

Milner, J. S. (1994). Assessing child abuse risk: The Child Abuse Potential Inventory. *Clinical Psychology Review, 14*, 547–583

Schafer, J. L., & Graham, J. W. (2002). Missing data: Our view of the state of the art. *Psychological Methods, 7*, 147-177. doi:10.1037/1082-989X.7.2.147

Taylor, A., Atkins, R., Kumar, R., Adams, D., & Glover, V. (2005). A new Mother-to-Infant Bonding Scale: Links with early maternal mood. *Archives of Women's Mental Health, 8*, 45-51. doi:10.1007/s00737-005-0074-z

# Table of Contents

|                                                                 |                 |
|-----------------------------------------------------------------|-----------------|
| <b>Acknowledgments</b>                                          | <b><i>i</i></b> |
| <b>Table of Contents</b>                                        | <b>ii</b>       |
| <b>Introduction</b>                                             | <b>iv</b>       |
| What does <i>Couple CARE for Parents of Newborns</i> involve?   | iv              |
| <b>Session 1: Life with Your New Baby</b>                       | <b>1</b>        |
| <b>Chapter 1: How Life Has Changed</b>                          | <b>1</b>        |
| Develop a Bond and Trust with Your Baby                         | 3               |
| <b>Tip Sheet — Playing with Your Baby</b>                       | <b>6</b>        |
| <b>Tip Sheet — How to Be a Terrific Parent</b>                  | <b>10</b>       |
| <b>Chapter 2: Challenges: Sleeping, Feeding, &amp; Crying</b>   | <b>11</b>       |
| <b>Tip Sheet — Sleep</b>                                        | <b>12</b>       |
| <b>Tip Sheet — Feeding</b>                                      | <b>16</b>       |
| <b>Tip Sheet — Benefits of Breastfeeding</b>                    | <b>18</b>       |
| Benefits for Babies                                             | 18              |
| Benefits for Mothers                                            | 18              |
| Benefits for Society                                            | 19              |
| Health Risks of Not Breastfeeding                               | 19              |
| <b>Tip Sheet — Breastfeeding</b>                                | <b>20</b>       |
| <b>Tip Sheet — Crying</b>                                       | <b>21</b>       |
| <b>Chapter 3: Self Change</b>                                   | <b>25</b>       |
| What is Self Change?                                            | 26              |
| How to Write a Self-Change Plan                                 | 27              |
| An Example of Self Change                                       | 28              |
| Before Session 2 Checklist                                      | 31              |
| Putting It Into Action                                          | 31              |
| <b>Session 2: Family Expectations and Communication</b>         | <b>32</b>       |
| <b>Chapter 4: Family Expectations</b>                           | <b>32</b>       |
| <b>Chapter 5: Communication</b>                                 | <b>34</b>       |
| Communication Skills                                            | 35              |
| Session 2 Self-Change Plan                                      | 39              |
| Session 2 Feedback: How's <i>Couple CARE for Parents</i> Going? | 41              |
| Before Session 3 Checklist                                      | 43              |
| Putting It Into Action                                          | 46              |
| <b>Session 3: Managing Stress and Differences</b>               | <b>47</b>       |
| <b>Chapter 6: Self-Talk</b>                                     | <b>47</b>       |
| What is Self-Talk?                                              | 47              |
| How to Fix Your Unhelpful Self-Talk                             | 49              |
| <b>Chapter 7: Communicating About Differences</b>               | <b>52</b>       |
| Tips for Problem Solving                                        | 52              |
| Session 3 Self-Change Plan                                      | 57              |
| Before Session 4 Checklist                                      | 58              |
| Putting It Into Action                                          | 58              |



|                                                                 |            |
|-----------------------------------------------------------------|------------|
| <b>Session 4: Managing Conflict</b>                             | <b>59</b>  |
| <b>Chapter 8: Managing Conflict</b>                             | <b>59</b>  |
| Conflict Styles                                                 | 59         |
| Breaking Conflict Loops                                         | 61         |
| Conflict Stopper: Pause, Calm and Think                         | 65         |
| Physical Conflicts                                              | 66         |
| Session 4 Self-Change Plan                                      | 69         |
| Session 4 Feedback: How's <i>Couple CARE for Parents</i> Going? | 71         |
| Before Session 5 Checklist                                      | 73         |
| Putting It Into Action                                          | 73         |
| <b>Session 5: Managing Challenges</b>                           | <b>75</b>  |
| <b>Chapter 9: Caring</b>                                        | <b>75</b>  |
| <b>Chapter 10: Managing the Load</b>                            | <b>80</b>  |
| Dividing Responsibilities                                       | 80         |
| <b>Chapter 11: Anticipating and Managing Challenges</b>         | <b>84</b>  |
| Session 5 Self-Change Plan                                      | 86         |
| Before Session 6 Checklist                                      | 88         |
| Putting It Into Action                                          | 88         |
| <b>Session 6: Roles, Sex, and Commitment</b>                    | <b>90</b>  |
| <b>Chapter 12: Managing Your Roles</b>                          | <b>90</b>  |
| Important/Urgent and Important/Non-Urgent                       | 91         |
| Balancing Priorities                                            | 92         |
| <b>Chapter 13: Sex After Having a Baby</b>                      | <b>93</b>  |
| Session 6 Self-Change Plan                                      | 97         |
| Before Session 7 Checklist                                      | 98         |
| Putting It Into Action                                          | 98         |
| <b>Session 7 – The Road Ahead</b>                               | <b>100</b> |
| <b>Chapter 14: Dealing with Change</b>                          | <b>100</b> |
| Managing Change                                                 | 101        |
| <b>Chapter 15: Relationship and Parenting Visions</b>           | <b>103</b> |
| Tips for Continuing to Improve                                  | 104        |
| <b>A Final Word</b>                                             | <b>104</b> |
| Session 7 Feedback: How's <i>Couple CARE for Parents</i> Going? | 105        |
| <b>Session 8 – Follow-Up</b>                                    | <b>107</b> |
| Putting It Into Action                                          | 107        |
| People Sometimes Feel Barriers to Commitment                    | 109        |
| It Takes Time                                                   | 109        |
| Differences in Commitment                                       | 110        |
| <b>Appendix A: Ideas for Couple Activities</b>                  | <b>111</b> |
| <b>Appendix B: Ideas for Individual Activities</b>              | <b>112</b> |
| <b>Resources</b>                                                | <b>113</b> |
